# Supplementary material
Source: PubMed Central journal article supplement (PMC1047089)

## Liver

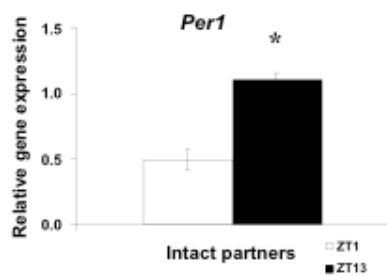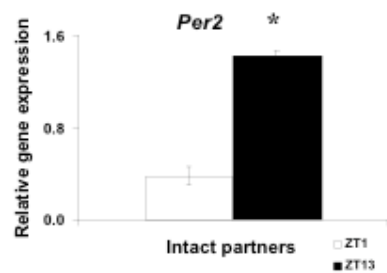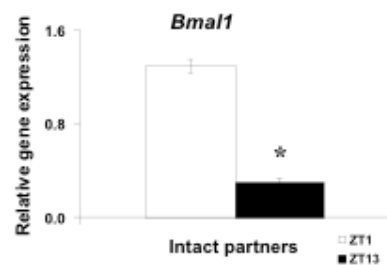

## Kidney

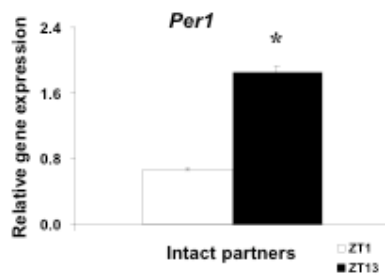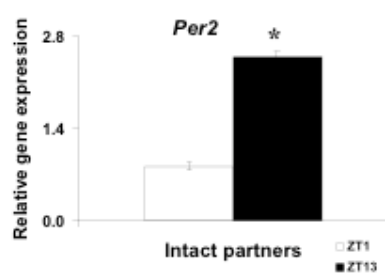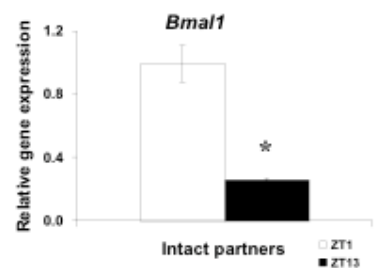

Supplement: pnas_102_8_3111__1.pdf [file pnas_102_8_3111__1.pdf]

## Heart

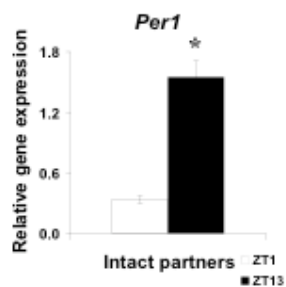

## Muscle

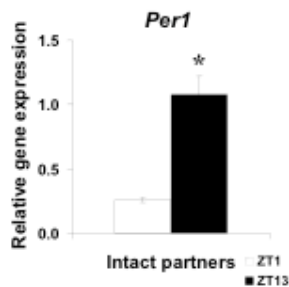

## Spleen

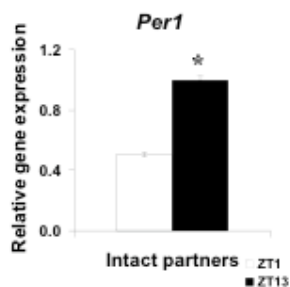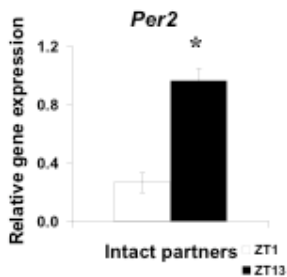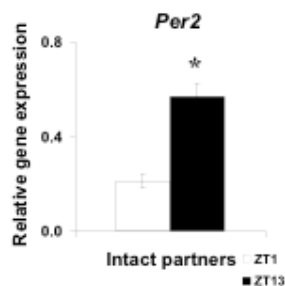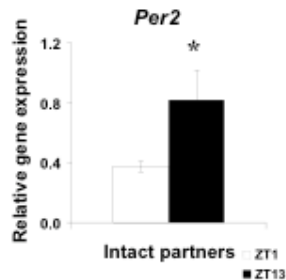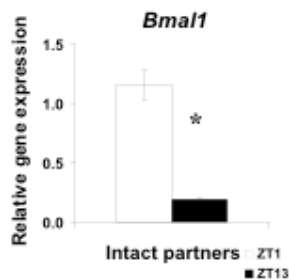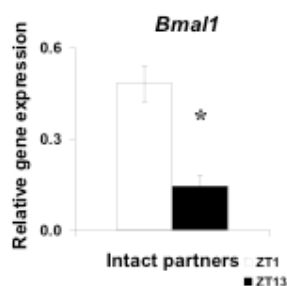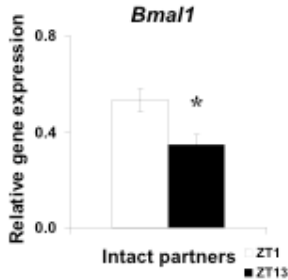

Supplement: pnas_102_8_3111__2.pdf [file pnas_102_8_3111__2.pdf]

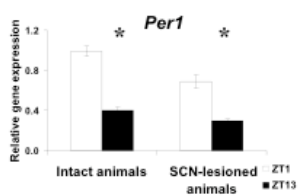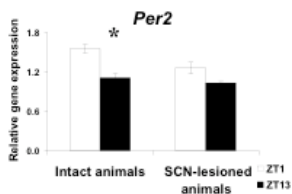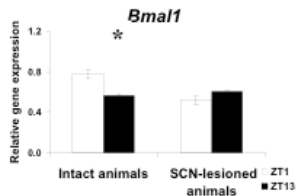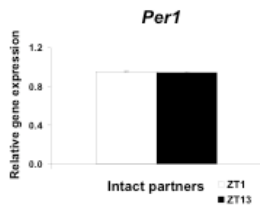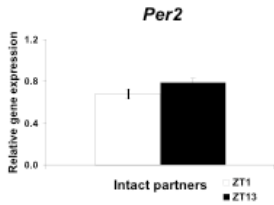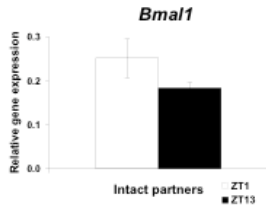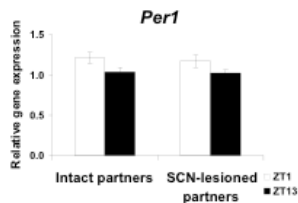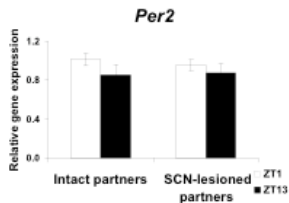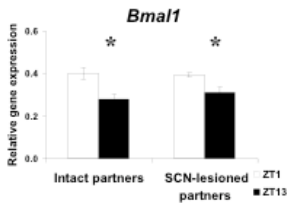

Supplement: pnas_102_8_3111__3.pdf [file pnas_102_8_3111__3.pdf]
